# Supplementary material for: Ontogenetic development of the European basal aquatic turtle &lt;i&gt;Pleurosternon bullockii&lt;/i&gt; (Paracryptodira, Pleurosternidae)
Source: Copernicus journal article supplement (doi:10.5194/fr-24-357-2021), 2021-11-19

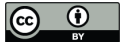

*Supplement of*

**Ontogenetic development of the European basal aquatic turtle  
*Pleurosternon bullockii* (Paracryptodira, Pleurosternidae)**

**Andrea Guerrero and Adán Pérez-García**

*Correspondence to:* Andrea Guerrero (guerbach@gmail.com)

The copyright of individual parts of the supplement might differ from the article licence.

**S1.** Estimated shell measures of juvenile specimens of *Pleurosternon bullockii* (Paracryptodira, Pleurosternidae), from the Berriasian (Early Cretaceous) of Swanage (Dorset, England). Abbreviation: N.A, not available. All the measures are in cm.

| SPECIMEN     | Carapace maximum length | Carapace maximum width | Plastron maximum length | Plastron maximum width |
|--------------|-------------------------|------------------------|-------------------------|------------------------|
| NHMUK 48262  | 13.5                    | 13                     | N. A                    | N. A                   |
| NHMUK 48263  | 11                      | 10.5                   | N. A                    | N. A                   |
| NHMUK 48264  | 8.5                     | 8                      | N. A                    | N. A                   |
| NHMUK 48263a | 5.5                     | 5                      | N. A                    | N. A                   |
| NHMUK 48263e | 5.5                     | 5                      | N. A                    | N. A                   |
| NHMUK 48347  | N. A                    | N. A                   | 13                      | 12.5                   |
| NHMUK 48343  | N. A                    | N. A                   | 11.5                    | 11                     |
| NHMUK 48344  | N. A                    | N. A                   | 5.5                     | 4.5                    |

**S2.** Sample sizes of the analyses performed through the quantitative approach.

| Elements               | Sample size (N) |
|------------------------|-----------------|
| Nuchal                 | 16              |
| Third vertebral scute  | 18              |
| Anterior plastral lobe | 13              |
| Entoplastron           | 21              |

**S3.** Definition of landmark location for the nuchal of *Pleurosternon bullockii* (Paracryptodira, Pleurosternidae), taking into account specimens from the Berriasian (Early Cretaceous) of Swanage (Dorset, England).

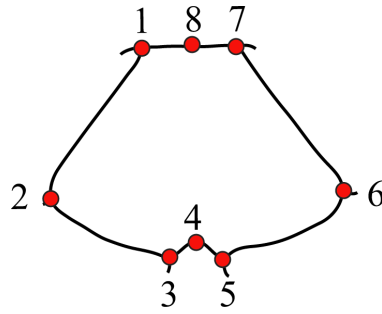

| View   | Landmark | Anatomical definition                                                              |
|--------|----------|------------------------------------------------------------------------------------|
| Dorsal | 1        | Anterior left contact between the nuchal and first peripheral                      |
| Dorsal | 2        | Posterior left contact between the nuchal and first peripheral                     |
| Dorsal | 3        | Posterior left contact between the nuchal and the first element of the neural row  |
| Dorsal | 4        | Medium point of posterior margin                                                   |
| Dorsal | 5        | Posterior right contact between the nuchal and the first element of the neural row |
| Dorsal | 6        | Posterior right contact between the nuchal and first peripheral                    |
| Dorsal | 7        | Anterior right contact between the nuchal and first peripheral                     |
| Dorsal | 8        | Medium point of anterior margin                                                    |

**S4.** Definition of landmark location for the third vertebral scute of *Pleurosternon bullockii* (Paracryptodira, Pleurosternidae), taking into account specimens from the Berriasian (Early Cretaceous) of Swanage (Dorset, England).

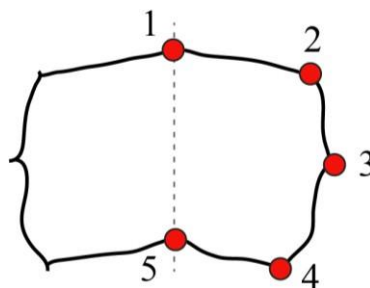

| View   | Landmark | Anatomical definition           |
|--------|----------|---------------------------------|
| Dorsal | 1        | Medium point of anterior margin |

|        |   |                                                             |
|--------|---|-------------------------------------------------------------|
| Dorsal | 2 | Anterior contact between the anterior and lateral margin    |
| Dorsal | 3 | Contact between the antero- and postero-lateral margins     |
| Dorsal | 4 | Posterior contact between the lateral and posterior margins |
| Dorsal | 5 | Medium point of posterior margin                            |

**S5.** Definition of landmark and semilandmark location for the anterior plastral lobe of *Pleurosternon bullockii* (Paracryptodira, Pleurosternidae), taking into account specimens from the Berriasian (Early Cretaceous) of Swanage (Dorset, England).

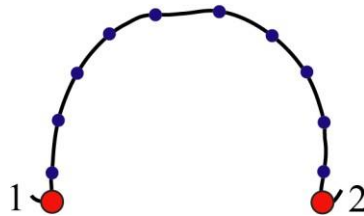

| View    | Landmark | Anatomical definition                        |
|---------|----------|----------------------------------------------|
| Ventral | 1        | Right axially notch                          |
| Ventral | 2        | Left axillary notch                          |
| Ventral | 3-12     | Semilandmarks: plate outline between LM1-LM2 |

**S6.** Definition of landmark and semilandmark location for the entoplastron of *Pleurosternon bullockii* (Paracryptodira, Pleurosternidae), taking into account specimens from both the Tithonian (Late Jurassic) and Berriasian (Early Cretaceous) of England.

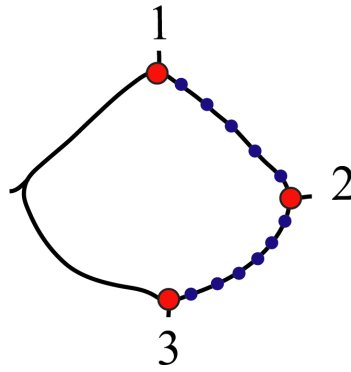

| View    | Landmark | Anatomical definition                                      |
|---------|----------|------------------------------------------------------------|
| Ventral | 1        | Anterior-most point of entoplastron                        |
| Ventral | 2        | Posterior contact between the entoplastron and epiplastron |
| Ventral | 3        | Posterior-most point of entoplastron                       |
| Ventral | 4-14     | Semilandmarks: plate outline between LM1-LM2 and LM2-LM3   |

**S7.** Principal Component Analysis considering the allometric components of shape for the shell of *Pleurosternon bullockii* (Paracryptodira, Pleurosternidae), taking into account specimens from the Berriasian (Early Cretaceous) of Swanage (Dorset, England). (a), Nuchal. (b), Third vertebral scute. (c), Anterior plastral lobe. (d), Entoplastron. Wireframes indicate the main shape changes of each PC, the light blue concerns the average shape, whereas the dark blue is the shape variance related to extreme of variation along the axis. Abbreviations: C, CAMSM; D, DORCM; N, NHMUK.



**S8.** P-P plots for diagnosing normal distribution of Procrustes residuals of the shell elements of *Pleurosternon bullockii* (Paracryptodira, Pleurosternidae), taking into account specimens from both the Tithonian (Late Jurassic) and Berriasian (Early Cretaceous) of England. (a), Nuchal. (b), Third vertebral scute. (c), Anterior plastral lobe. (d), Entoplastron.

(a)

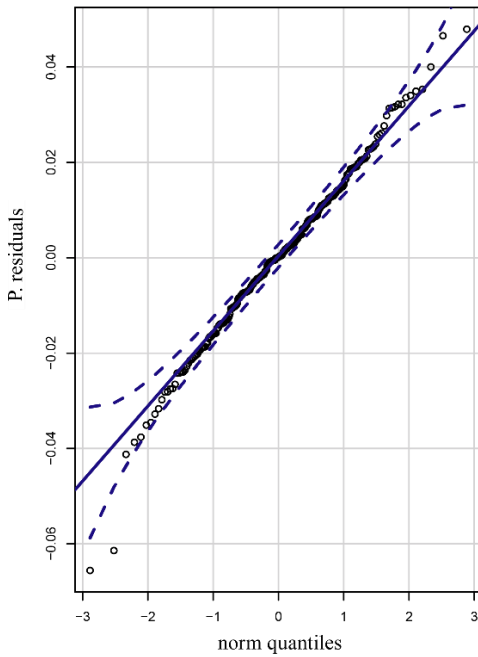

(b)

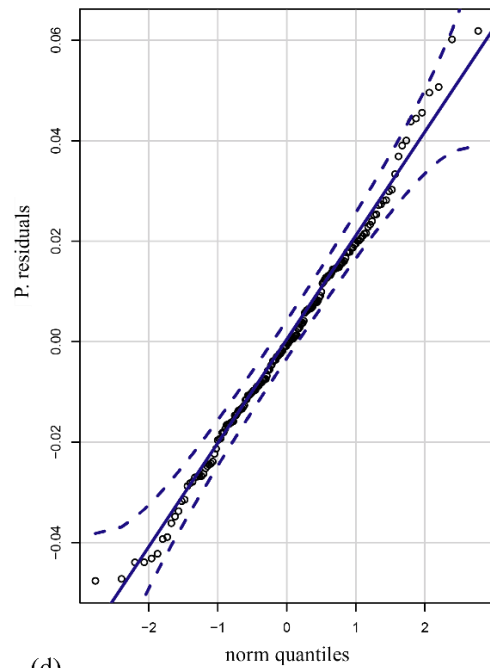

(c)

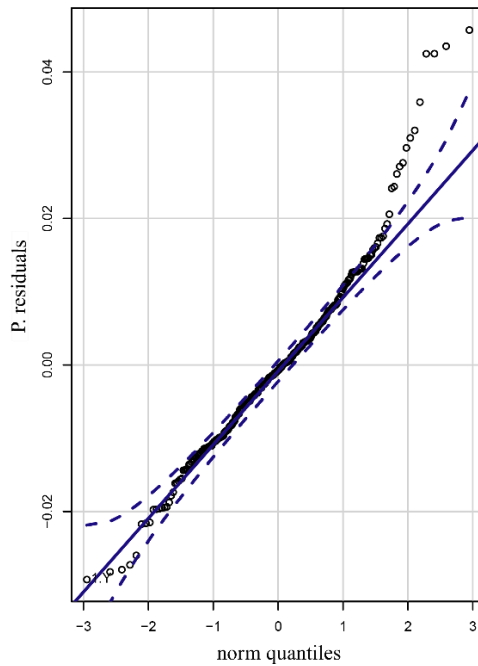

(d)

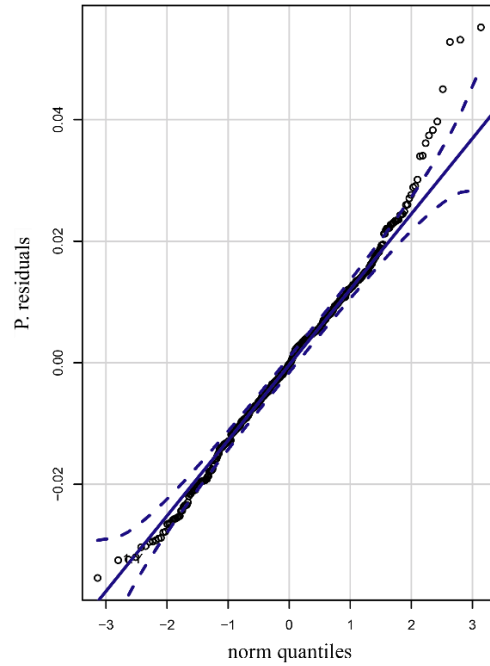

**S9.** Comparison of the carapace size recognized in different ontogenetic stages (adult and juvenile) of *Pleurosternon bullockii* (Paracryptodira, Pleurosternidae) from the Tithonian (Upper Jurassic) and Berriasian (Lower Cretaceous) of the United Kingdom. (a), Reconstruction of dorsal view of the juvenile carapace based on NHMUK 48262 and NHMUK 48263. (b), Reconstruction of dorsal view of the adult carapace based on CAMSM J5327. (c)-(d), Histogram of the carapace length (c) and width (d). Scale bar equals 2cm.

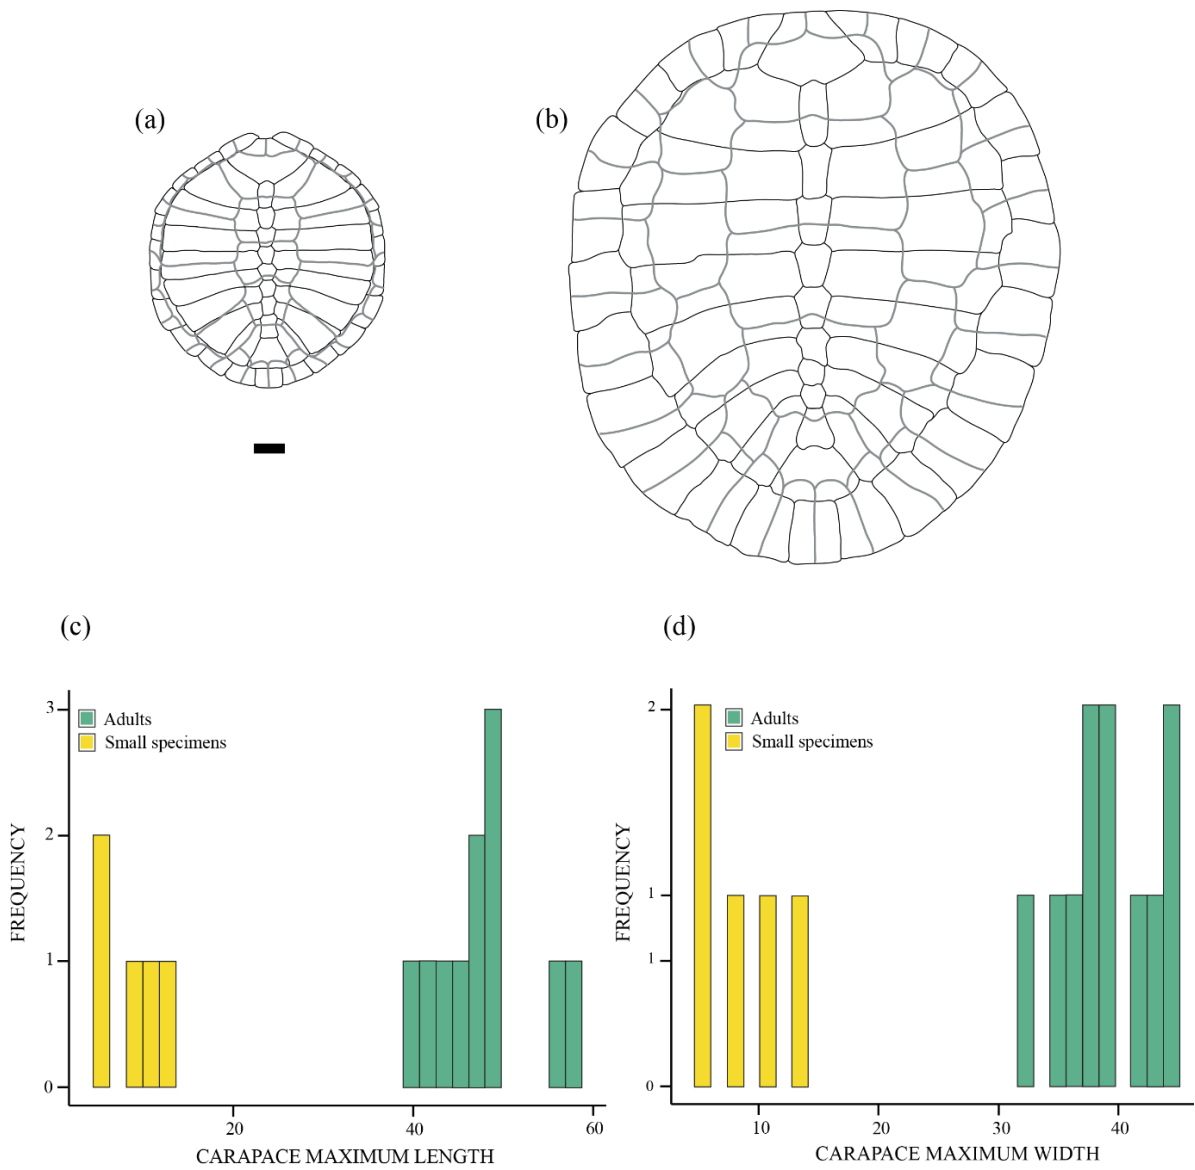



**S10.** Comparison of the plastron size recognized in different ontogenetic stages (adult, subadult and juvenile) of *Pleurosternon bullockii* (Paracryptodira, Pleurosternidae) from the Tithonian (Upper Jurassic) and Berriasian (Lower Cretaceous) of the United Kingdom. (a), Reconstruction of ventral view of the juvenile plastron based on NHMUK 48262, NHMUK 48343 and NHMUK 48347. (b), Reconstruction of ventral view of the subadult plastron based on NHMUK OR 28433. (c), Reconstruction of ventral view of the adult plastron based on NHM UK R 3413. (d)-(e), Histogram of the plastron length (d) and width (e). Scale bar equals 2cm.

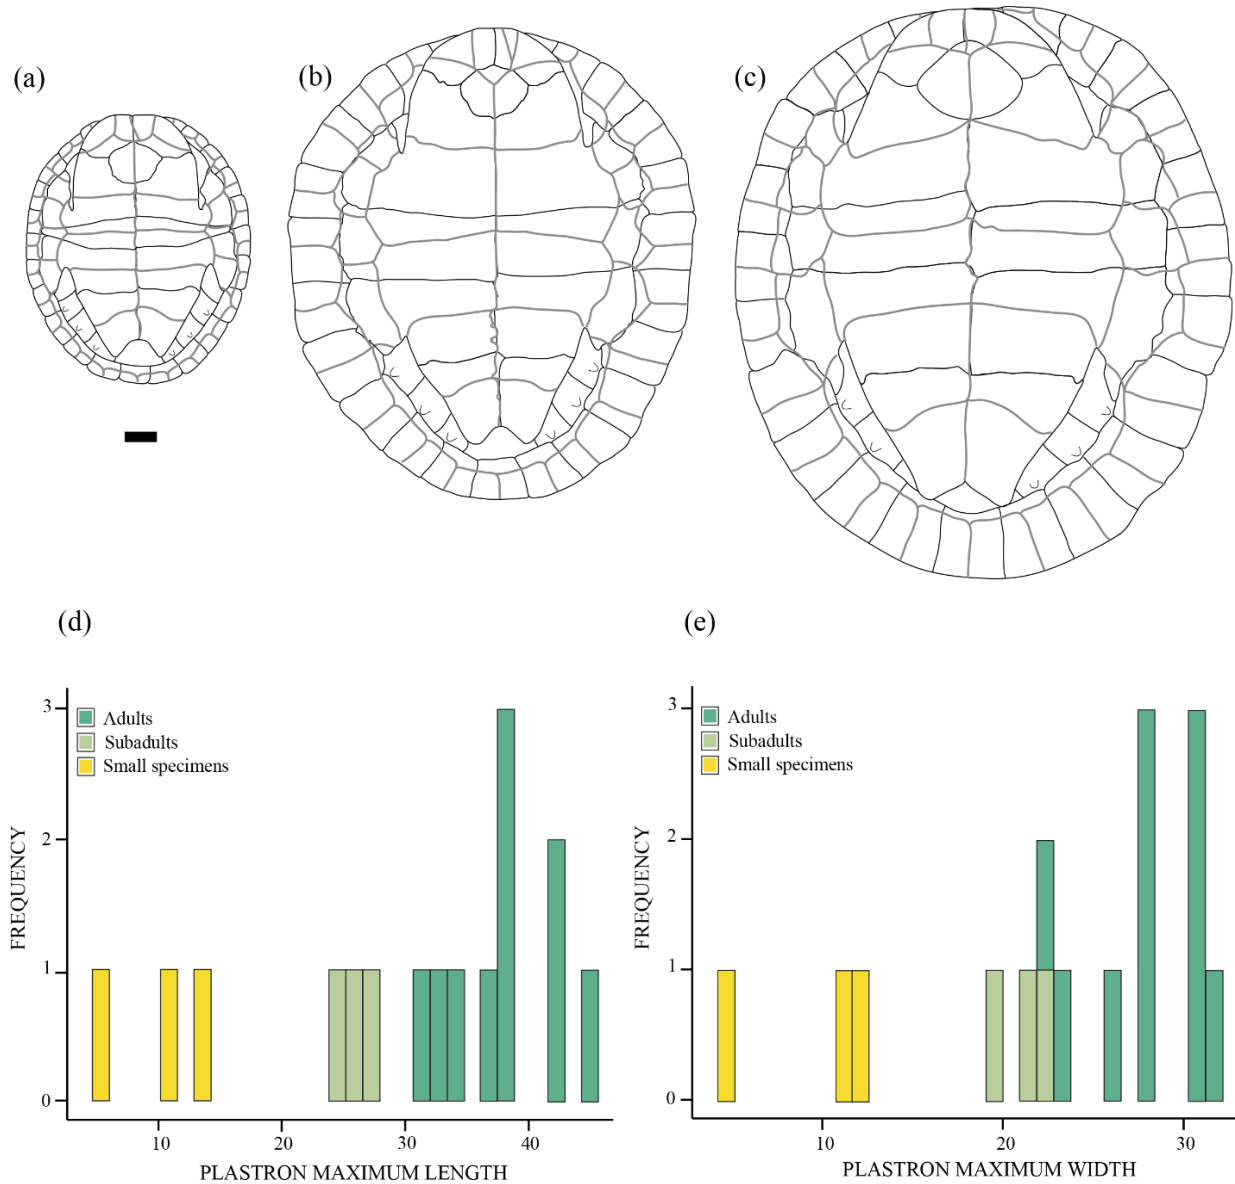

Supplement: Supplementary file 2 [file fr-24-357-2021-supplement.pdf]
